# Supplementary material for: Genomic profiling supports the diagnosis of primary ciliary dyskinesia and reveals novel candidate genes and genetic variants
Source: PubMed Central journal article supplement (PMC6177184; doi:10.1371/journal.pone.0205422), 2018-10-09
Supplement: pone.0205422.s001.pdf [file pone.0205422.s001.pdf]

**Met**IPASAKAPHKQPHKQSSISIGRGTRKRDEEDSGTEVG  
EGTDEWAQSKATVRPPDQLELTD AELKEEFTRILTAN  
NPHAPQNI VRYSFKEGTYKPIGFVNQLAVHYTQVGNL  
IPKDSDEGRRQH YRDELVAGSQESVKVISETGNLEED  
EEPKELETEPGSQTDVPAAGAAEKVTEEEL **Met**TPKQP  
KERKLTNQFNFSERASQTYNNPVRDRECQTEPPPR  
NFSATANQWEIYDAYVEELEKQEKTKEKEKAKTPVAK  
KSGK **Met**A **Met**RKLT S **Met**ESQTDDLKLSQAAKI **Met**E  
R **Met**VNQNTYDDIAQDFKY YDDAADEYRDQVGYPA  
AALEVPK **Stop**QSQAPVRHCPLLESKVQGSVCSGIWLL **Stop**L  
HEAEPGHAAALQPEEPQLP **Stop**VHVQQQQR RHVSRH  
PRGPPLPGGSRPL **Stop**RQRGHLQPQEAPL PALLQLS  
QVWQALRPCVAGQVAEG **Stop**HGPKP **Stop**LLLCVI **Stop**R  
QDCVLD SREEKAGSHRCHQAEGGRQH HGSS **Stop**GVA  
AAP SGLWHCL **Stop**LPQRD **Stop**LHVPSGHRGGKNLQV  
L **Stop**ILLQPIPRHL **Stop**RPQHVS GHCVLEPIPHQGLHVL  
QLRLDSEDLGPHHQDPDVHL **Stop**PELSRG **Stop**CGLGA  
ILFYCVRSSHHRWEGPHI **Stop**LSHQQV **Stop**GHLQPAC  
GG|QKEQAHPRAVQSHPPHHHCGR **Stop**
