# Supplementary material for: Genomic profiling supports the diagnosis of primary ciliary dyskinesia and reveals novel candidate genes and genetic variants
Source: PubMed Central journal article supplement (PMC6177184; doi:10.1371/journal.pone.0205422), 2018-10-09
Supplement: pone.0205422.s003.pdf [file pone.0205422.s003.pdf]

| <b>Title of primers</b> | <b>Orientation</b> | <b>Sequence of primers</b>      | <b>Length<br/>in bp</b> |
|-------------------------|--------------------|---------------------------------|-------------------------|
| DNAL1_116/117F          | Forward            | 5'-CTCCCACACAACACTACTAGCTC-3'   | 21                      |
| DNAL1_116/117R          | Reverse            | 5'-CTGTTTCTCTCTGAGCTTAGCC-3'    | 22                      |
| DNAL1_162F              | Forward            | 5'-ATCTCCTGATGTCGTGATCCGC-3'    | 22                      |
| DNAL1_162R              | Reverse            | 5'-CACCTTGGCTCAAACCTAGACC-3'    | 22                      |
| LRRC6_9F                | Forward            | 5'-CAAAAACCTCCAGGAGGAGGTACC-3'  | 23                      |
| LRRC6_9R                | Reverse            | 5'-CACAGCACTTTCCAAAGTTCTCTC-3'  | 24                      |
| LRRC6_466F              | Forward            | 5'-GGATGGGTGAGTTGAATCTG-3'      | 20                      |
| LRRC6_466R              | Reverse            | 5'-GTTAAAACACTGGAGCAGCG-3'      | 20                      |
| DNAH5_379F              | Forward            | 5'-GAGCTTCAAAGCAGCCATGTAG-3'    | 22                      |
| DNAH5_379R              | Reverse            | 5'-CTCCCTCACATCCTTCCATTTTC-3'   | 22                      |
| DNAH5_2542F             | Forward            | 5'-GGGGAGAATTTGGAAGGTGAC-3'     | 21                      |
| DNAH5_2542R             | Reverse            | 5'-GGATGCTTCATGTCTCCCC-3'       | 19                      |
| DNAH5_INTF              | Forward            | 5'-GGAGGAGAGGAGCTTTTTGG-3'      | 20                      |
| DNAH5_INTR              | Reverse            | 5'-GGGGTGAAAAGAGAACTTGGC-3'     | 21                      |
| CCDC40_83F              | Forward            | 5'-CAGGTGTCACCACCAGAG-3'        | 18                      |
| CCDC40_83R              | Reverse            | 5'-CTCTTGCTGGAAGCCTTGG-3'       | 19                      |
| SCNN1A_522F             | Forward            | 5'-GCTGTTTCACCAAGTGCC-3'        | 18                      |
| SCNN1A_522R             | Reverse            | 5'-CCTAGGAAAGAATGGGGGTG-3'      | 20                      |
| DNAH11_2600F            | Forward            | 5'-CCACAGGGTGGATGAAATCG-3'      | 20                      |
| DNAH11_2600R            | Reverse            | 5'-CCAACCTTTCCAAAGATACAAAGGG-3' | 24                      |
| DNAH11_2852F            | Forward            | 5'-CCTGGGCAACAGAGCAAGTC-3'      | 20                      |
| DNAH11_2852R            | Reverse            | 5'-GCCTTGGCCAAATCTGGGAG-3'      | 20                      |
| DNAI1_947_948F          | Forward            | 5'-CCTGGGTTTGCCATAAAGCG-3'      | 20                      |
| DNAI1_947_948R          | Reverse            | 5'-GTACTGGGGGTTTGGGATGTAGAG-3'  | 24                      |
| CCDC40_2440F            | Forward            | 5'-CGGTCTAGGGGGAAGAAGTG-3'      | 20                      |

|              |         |                                    |    |
|--------------|---------|------------------------------------|----|
| CCDC40_2440R | Reverse | 5'-GCAGGCAGTGGTTCACATTTAC-3'       | 22 |
| DNAH5e13_F   | Forward | 5'-CAGTACCCGTGGAACCTGAC-3'         | 20 |
| DNAH5e13_R   | Reverse | 5'-CTATGACCTTGTGACCCAAATTGCC-3'    | 25 |
| DNAH5e54_F   | Forward | 5'-CATACGTATACGATAGAACAAAATCAGC-3' | 28 |
| DNAH5e54_R   | Reverse | 5'-CCCAATAGCACTTATTCACACCAC-3'     | 24 |
| SPAG17e5_F   | Forward | 5'-CCTCATGCATAAATGTGCCTTGTAC-3'    | 26 |
| SPAG17e5_R   | Reverse | 5'-GCCACTGTGTTTCACTCGTGAAAG-3'     | 24 |
| SPAG16e4_F   | Forward | 5'-GATAGGAGGACAGAGATTTGTTTGC-3'    | 26 |
| SPAG16e4_R   | Reverse | 5'-GGTTTCAGGGCTGGAGATG-3'          | 19 |
| CFTR22e_F    | Forward | CCTGTTAGTTCATTGAAAAGCCCG           | 25 |
| CFTR22e_R    | Reverse | CTGCTTGCTTTGTTAGACTGTGTTT          | 24 |
| SPAG16e10_F  | Forward | 5'-CAGAGTATCAACCTGTGCAGTG-3'       | 22 |
| SPAG16e10_R  | Reverse | 5'-CTTAGTCTGTACTGCCACCAAG-3'       | 22 |
| DNAH5e10_F   | Forward | 5'-CCCAAGCTCAAGTTAGAAGATTGTG-3'    | 25 |
| DNAH5e10_R   | Reverse | 5'-GACATAGTAGGCTCCCAAGGAG-3'       | 22 |
| DNAH5e49_F   | Forward | 5'-GGAAACACTCAAGGAGTTAGGCTC-3'     | 24 |
| DNAH5e49_R   | Reverse | 5'-CAAGCAGGTGTTCTTCCTCACC-3'       | 22 |
| DNAI1eg14_F  | Forward | 5'-GACAGAGATGGATGGAAGGAGGGAG-3'    | 25 |
| DNAI1eg14_R  | Reverse | 5'-CTTTGCCATTTAGCTCCCTGCCTC-3'     | 24 |
| DNAI1eg17_F  | Forward | 5'-CCAGGGAAGTGGTGGCTGC-3'          | 19 |
| DNAI1eg17_R  | Reverse | 5'-CTGCAGAGGTGGAGGGTGGAAAG-3'      | 23 |
