# Supplementary material for: Genomic profiling supports the diagnosis of primary ciliary dyskinesia and reveals novel candidate genes and genetic variants
Source: PubMed Central journal article supplement (PMC6177184; doi:10.1371/journal.pone.0205422), 2018-10-09
Supplement: pone.0205422.s004.pdf [file pone.0205422.s004.pdf]

| <b>Title of primers</b> | <b>Orientation</b> | <b>Sequence of primers</b>        | <b>Length in bp</b> |
|-------------------------|--------------------|-----------------------------------|---------------------|
| DNAI1_F_Exp             | Forward            | 5'-GTCCCAAGCTGCTAAGATCATGGAGCG-3' | 27                  |
| DNAI1_R_Exp             | Reverse            | 5'-CAGGGTACCCACCTGGTCCC-3         | 20                  |
