# Supplementary material for: Genomic profiling supports the diagnosis of primary ciliary dyskinesia and reveals novel candidate genes and genetic variants
Source: PubMed Central journal article supplement (PMC6177184; doi:10.1371/journal.pone.0205422), 2018-10-09
Supplement: pone.0205422.s005.pdf [file pone.0205422.s005.pdf]

|                 |     |     |     |     |     |     |     |     |     |
|-----------------|-----|-----|-----|-----|-----|-----|-----|-----|-----|
| <b>Position</b> | 337 | 352 | 385 | 387 | 404 | 436 | 456 | 458 | 498 |
| <b>Residue</b>  | A   | Y   | G   | M   | V   | W   | S   | G   | C   |
| <b>Position</b> | 500 | 517 | 541 | 542 | 562 | 586 | 603 | 631 | 633 |
| <b>Residue</b>  | T   | E   | M   | S   | D   | G   | T   | R   | T   |
