# Supplementary material for: Genomic profiling supports the diagnosis of primary ciliary dyskinesia and reveals novel candidate genes and genetic variants
Source: PLoS One. 2018 Oct 9;13(10):e0205422. doi: 10.1371/journal.pone.0205422 (PMC6177184; doi:10.1371/journal.pone.0205422)
Supplement: S2 Fig — Two sequences were aligned from TGA stop codon and results indicate to evolutionary conservation of 53.3% among the mutated DNAI1 mRNA and SelP mRNA transcripts. (PDF) [file pone.0205422.s002.pdf]

|                     |                                                                            |
|---------------------|----------------------------------------------------------------------------|
| 3'UTR of Selp mRNA  | ----ATAATTAGCAGTTTAGAATGGAGGAAG--AACAACAAAGACA-----TGCTTTCCA               |
| 3'UTR of DNAI1 mRNA | CTGGACAAACTGCTGAACCTGGTGAGGGAAGTGAAAATCA-AGACCTGA <sup>1</sup> GGGGCTGGCCT |
|                     | * ** : **,* : : . . . ** . ***** **,* ** ***** **                          |
| 3'UTR of Selp mRNA  | TTTTTTCTTTACTTATCTCTC-AAAACAATATTACTTTGTCTTTTCAATCTTCTACTTT                |
| 3'UTR of DNAI1 mRNA | CAGT-CTCTGT-CCCATCGCTTGAATACAGTACTCCTAGGGCTTGACCCT-----                    |
|                     | : * *** * * *** ** **,**** ** *,** : * *** :* ** *                         |
